# Supplementary material
Source: Royal Society of Chemistry journal article supplement (doi:10.1039/b814207f)
Supplement: b814207f.pdf [file b814207f.pdf]

## Supporting Information

### *Prochiral* CODs in Cationic DUPHOS-Rh(I) Catalysis of Highly Enantioselective Intramolecular [4+2]Cycloaddition

Martial Vallet,<sup>a</sup> Hitomi Kakuno,<sup>a</sup> Susumu Kawauchi,<sup>b</sup> Kohsuke Aikawa<sup>a</sup> and Koichi Mikami\*<sup>a</sup>

[<sup>a</sup>] Prof. Dr. K. Mikami, Dr. M. Vallet, Dr. K. Aikawa, H. Kakuno

Department of Applied Chemistry  
Graduate School of Science and Engineering  
Tokyo Institute of Technology  
O-okayama, Meguro-ku, Tokyo 152-8552 (Japan)  
Fax: Int. code (+81)3-5734-2776  
E-mail: kmikami@o.cc.titech.ac.jp

[<sup>b</sup>] Prof. Dr. S. Kawauchi

Department of Organic and Polymeric Materials  
Tokyo Institute of Technology  
O-okayama, Meguro-ku, Tokyo 152-8552 (Japan)  
Fax Int. Code (+81)3-5734-2888  
E-mail: skawauch@polymer.titech.ac.jp

#### General:

All reactions involving air sensitive organometallic compounds were carried out under an atmosphere of argon using an inert gas/vacuum double manifold and standard Schlenck techniques.<sup>1</sup>

<sup>1</sup>H, <sup>13</sup>C, <sup>19</sup>F and <sup>31</sup>P NMR spectra were measured on Bruker AV300 (300 MHz) spectrometers.

Chemical shift of <sup>1</sup>H NMR was expressed in parts per million downfield from tetramethylsilane as an internal standard ( $\delta = 0$ ) in CDCl<sub>3</sub>. Significant <sup>1</sup>H NMR data were tabulated in following order: multiplicity (s: singlet; d: doublet; t: triplet; q: quartet; br s: broad singlet; br d: broad doublet; m: multiplet) and coupling constants (J) are reported (Hz). Chemical shifts of <sup>13</sup>C NMR were expressed in parts per million downfield from CDCl<sub>3</sub> as an internal standard ( $\delta = 77.0$ ) in CDCl<sub>3</sub>. Chemical shifts of <sup>19</sup>F NMR were expressed in parts per million downfield from BTF as an external standard ( $\delta = -63.24$ ) in CDCl<sub>3</sub>. Chemical shifts of <sup>31</sup>P NMR were expressed in parts per million downfield from 85% H<sub>3</sub>PO<sub>4</sub> as an external standard ( $\delta = 0$ ) in CDCl<sub>3</sub>.

Analytical thin layer chromatography (TLC) were performed on a glass plates and/or aluminum sheets pre-coated with silica-gel (Merck Kieselgal 60 F<sub>254</sub>, layer thickness 0.25 and 0.2 mm). Column

chromatography was performed on Merck Kieselgel 60 and KANTO Silica Gel 60N (spherical, neutral).

Capillary gas chromatographic analysis (GC) was conducted on Shimadzu GC-14B instrument equipped with FID detector and capillary column coated with PEG-20 M by using He as a carrier gas. Peak area was calculated by Shimadzu C-R6A as an automatic integrator. CP-Cyclodextrin- $\beta$ -2,3,6-M-19 (i.d. 0.25 mm x 25 m, CHROMPACK; GL Science) was used as chiral columns. Split ratio was 100:1.

Optical rotations were measured on a JASCO P-1020.

1,5-Dibromo-1,5-cyclooctadiene and 1,5-diphenyl-1,5-cyclooctadiene (**3b**) were prepared according to the literature procedure.<sup>2</sup>

### 1,5-Dimethyl-1,5-cyclooctadiene (**3a**)

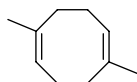

Methyl Grignard reagent (1.59 mmol) was added to a suspension of 1,5-dibromo-1,5-cyclooctadiene (280 mg, 1.05 mmol) and NiCl<sub>2</sub>dppp (23 mg, 0.04 mmol) in 20 ml of dry Et<sub>2</sub>O under argon at 0 °C.<sup>2</sup> The reaction mixture was stirred for 30 min at 0°C, 1 h at room temperature, and then for 2 h at reflux. H<sub>2</sub>O (20 ml) was added and the reaction mixture was extracted three times with Et<sub>2</sub>O. Combined organic layer were dried over MgSO<sub>4</sub> and solvents were removed under reduced pressure. Crude product was purified by flash chromatography over silicagel eluted with pentane to afford 128 mg (90%) of a colorless oil.

<sup>1</sup>H NMR (300 MHz, CDCl<sub>3</sub>)  $\delta$  0.95 (d,  $J$  = 6.9 Hz, 12 H, Me), 2.29-2.38 (m, 10 H, CH<sub>2</sub>, CH), 5.32 (t,  $J$  = 6.0 Hz, 2H, CH).

<sup>13</sup>C NMR (CDCl<sub>3</sub>, 75 MHz)  $\delta$  26.3, 33.3, 122.5, 135.8.

### 1,5-Diisopropyl-1,5-cyclooctadiene (**3c**)

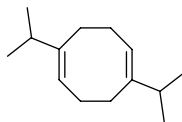

The titled compound was prepared from 1,5-dibromo-1,5-cyclooctadiene according to the procedure as described for 1,5-dimethyl-1,5-cyclooctadiene.<sup>2</sup> Colorless oil, 182 mg (90%).

<sup>1</sup>H NMR (300 MHz, CDCl<sub>3</sub>)  $\delta$  1.70 (s, 6 H, Me), 2.29-2.38 (m, 8 H, CH<sub>2</sub>), 5.36 (t,  $J$  = 6.0 Hz, 2H, CH).

<sup>13</sup>C NMR (CDCl<sub>3</sub>, 75 MHz)  $\delta$  26.3, 33.3, 122.5, 135.8.

IR (neat): 2957 (s), 2931 (s), 2879 (s), 1659 (s), 1491 (m), 1603 (s), 1380 (m), 1359 (m), 1301 (w), 1255 (w), 1209 (w), 1091 (w), 1018 (w), 890 (w), 839 (w), 809 (w).

### 1,5-Dibenzyl-1,5-cyclooctadiene (3d)

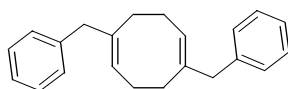

The titled compound was prepared from 1,5-dibromo-1,5-cyclooctadiene according to the procedure as described for 1,5-dimethyl-1,5-cyclooctadiene.<sup>2</sup> Colorless oil, 273 mg (90%).

<sup>1</sup>H NMR (300 MHz, CDCl<sub>3</sub>) δ 2.42-2.35 (m, 4 H, CH<sub>2</sub>), 3.40 (s, 2 H, CH<sub>2</sub>), 5.49 (t, *J* = 5.7 Hz, 2H, CH), 7.43-4.29 (m, 10 H, A<sub>arom</sub>).

<sup>13</sup>C NMR (CDCl<sub>3</sub>, 75 MHz) δ 26.8, 31.6, 38.3, 46.8, 125.4, 126.2, 128.4, 128.6, 129.31, 138.9, 141.0, 142.1.

IR (neat): 3082 (s), 3060 (s), 3024 (s), 2884 (s), 2830 (s) 1946 (w), 1869 (w), 1804 (w), 1743 (w), 1660 (w), 1601 (s), 1493 (s), 1453 (s), 1076 (s), 1029 (s), 908 (s), 844 (s), 743 (s), 699 (s).

### [RhCl{(R,R)-DUPHOS}]<sub>2</sub> (5)<sup>3</sup>

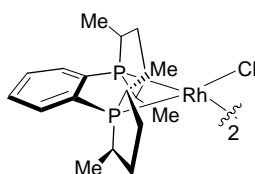

$\mu$ -Dichlorotetraethylenedirhodium (40 mg, 0.10 mmol) was added to a solution of (*R,R*)-DUPHOS (60 mg, 0.19 mmol) in 1 ml of dry CH<sub>2</sub>Cl<sub>2</sub> at room temperature under argon. The reaction mixture was stirred 30 min at room temperature, then the complex was precipitated by addition of Et<sub>2</sub>O. The precipitated complex was washed three times with Et<sub>2</sub>O, then dried *in vacuo* to afford 80 mg (90%) of a yellow solid.

<sup>1</sup>H NMR (300 MHz, CDCl<sub>3</sub>) δ 1.01 (dd, *J* = 6.6 Hz, *J* = 13.8 Hz, 6H, CH<sub>3</sub>), 1.29 (dd, *J* = 7.5 Hz, *J* = 15.9 Hz, 6H, CH<sub>3</sub>), 1.72 (dq, *J* = 5.4 Hz, *J* = 13.2 Hz, 2H), 2.14 (dq, *J* = 5.7 Hz, *J* = 12.9 Hz, 2H), 2.60-2.40 (bm, 4H), 2.80-2.90 (bm, 2H), 2.97 (dq, *J* = 6.3 Hz, *J* = 12.9 Hz, 2H), 7.69 (s, 2H), 7.85 (s, 2H).

<sup>31</sup>P NMR (CD<sub>2</sub>Cl<sub>2</sub>, 121.5 MHz) δ 75.9 (d, *J* = 131 Hz).

Anal. Calcd for C<sub>36</sub>H<sub>56</sub>Cl<sub>2</sub>P<sub>4</sub>Rh<sub>2</sub>/3H<sub>2</sub>O: C, 45.83; H, 6.62%. Found: C, 45.49; H, 6.52%.

### 1-Prop-2-ynoxy-hexa-2,4-diene

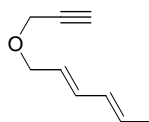

To a solution of NaH (105.6 mg, 4.4 mmol) in THF (2.0 ml) was added *trans,trans*-2,4-hexadiene-1-ol (0.45 ml, 4.0 mmol) in THF (0.5 ml) at 0 °C under argon atmosphere. After stirring for 45 min at room temperature, propargyl bromide (0.33 ml, 4.4 mmol) was added to the reaction mixture at 0 °C. After stirring for 12 h, ice water was added to the solution carefully and mixture was extracted with ether twice. The organic layer was washed with brine and dried over

MgSO<sub>4</sub>. After concentration under reduced pressure, the residue was purified by silica-gel chromatography (pentane/ether = 20/1) to give 425 mg (78%) of a pale yellow oil.

<sup>1</sup>H NMR (300 MHz, CDCl<sub>3</sub>) δ 1.75 (d, *J* = 6.6 Hz, 3 H), 2.41 (s, 1 H), 4.12 (s, 2 H), 4.07 (d, *J* = 6.6 Hz, 2 H), 5.59 (dt, *J* = 15.3, 6.5 Hz, 1 H), 5.72 (dq, *J* = 14.9, 6.7 Hz, 1 H), 6.05 (dd, *J* = 15.0, 15.0 Hz, 1 H), 6.23 (dd, *J* = 15.2, 10.4 Hz, 1 H).

<sup>13</sup>C NMR (CDCl<sub>3</sub>, 75 MHz) δ 18.1, 56.7, 70.0, 74.3, 79.8, 125.5, 130.5, 130.6, 134.2.

HRMS (EI), Calcd for C<sub>9</sub>H<sub>12</sub>O [M<sup>+</sup>]: 136.0888, Found: 136.0887.

### (3-Hexa-2,4-dienyloxy-prop-1-ynyl)-benzene (1a)

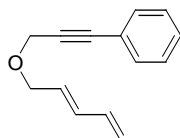

To a suspension of PdCl<sub>2</sub>(PPh<sub>3</sub>)<sub>2</sub> (70.2 mg, 0.10 mmol) and CuI (9.5 mg, 0.05 mmol) was added iodobenzene (1.12 ml, 10.0 mmol), diethylamine (15 ml), and 1-prop-2-ynyloxy-hexa-2,4-diene (0.68 g, 5.0 mmol) under argon atmosphere, and the mixture was refluxed for 3 h (monitored by TLC). After cooled to room temperature, the resultant mixture was added to ether, and then filtered by celite. After evaporation under reduced pressure, the resultant residue was purified by silica-gel chromatography to give 955 mg (90%) a colorless oil.

<sup>1</sup>H NMR (300 MHz, CDCl<sub>3</sub>) δ 1.79 (dd, *J* = 6.9, 0.6 Hz, 3H), 4.17 (d, *J* = 6.3 Hz, 2H), 4.38 (s, 2H), 5.63-5.82 (m, 2H), 6.06-6.15 (m, 1H), 6.29 (dd, *J* = 15.0, 10.5 Hz, 1H), 7.31-7.36 (m, 3H), 7.46-7.49 (m, 2H).

<sup>13</sup>C NMR (75 MHz, CDCl<sub>3</sub>) δ 18.1, 57.6, 70.1, 85.2, 86.2, 122.7, 125.8, 128.2, 128.4, 130.5, 130.7, 131.7, 134.2.

HRMS (EI), Calcd for C<sub>15</sub>H<sub>16</sub>O [M<sup>+</sup>]: 212.1201, Found: 212.1205.

### 1-(3-Hexa-2,4-dienyloxy-prop-1-ynyl)-4-methoxy-benzene (1b)

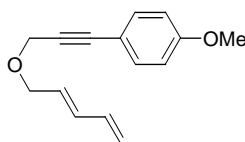

Colorless oil, 1,089 g (90%).

<sup>1</sup>H NMR (300 MHz, CDCl<sub>3</sub>) δ 1.76 (d, *J* = 6.0 Hz, 3H), 3.81 (s, 3H), 4.13 (d, *J* = 6.6 Hz, 2H), 4.34 (s, 2H), 5.60-5.79 (m, 2H), 6.00-6.12 (m, 1H), 6.26 (dd, *J* = 14.7, 10.2 Hz, 1H), 6.83 (d, *J* = 9.0 Hz, 2H), 7.39 (d, *J* = 9.0 Hz, 2H).

$^{13}\text{C}$  NMR (75 MHz,  $\text{CDCl}_3$ )  $\delta$  17.8, 54.9, 57.5, 69.8, 83.6, 85.9, 113.7, 114.6, 125.8, 129.9, 130.6, 133.0, 133.7, 159.5.

HRMS (EI), Calcd for  $\text{C}_{16}\text{H}_{18}\text{O}_2$  [ $\text{M}^+$ ]: 242.1307, Found: 242.1313.

**1-Chloro-4-(3-hexa-2,4-dienyloxy-prop-1-ynyl)-benzene (1c)**

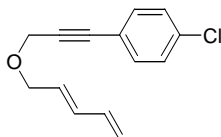

Colorless oil, 1.109 g (90%).

$^1\text{H}$  NMR (300 MHz,  $\text{CDCl}_3$ )  $\delta$  1.73 (d,  $J = 6.6$  Hz, 3H), 4.01 (d,  $J = 6.3$  Hz, 2H), 4.32 (s, 2H), 5.57-5.75 (m, 2H), 6.04 (ddd,  $J = 14.7, 10.5, 1.2$  Hz, 1H), 6.24 (dd,  $J = 15.3, 10.5$ , 1H), 7.25 (dt,  $J = 8.7, 2.1$  Hz, 2H), 7.34 (dt,  $J = 8.7, 2.1$  Hz, 2H).

$^{13}\text{C}$  NMR ( $\text{CDCl}_3$ , 75 MHz)  $\delta$  17.9, 57.4, 70.0, 84.9, 86.3, 121.1, 125.6, 128.4, 130.2, 130.6, 132.8, 133.9, 134.3.

HRMS (EI), Calcd for  $\text{C}_{15}\text{H}_{15}\text{ClO}$  [ $\text{M}^+$ ]: 246.0811, Found: 246.0818.

**1-Fluoro-4-(3-hexa-2,4-dienyloxy-prop-1-ynyl)-benzene (1d)**

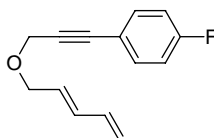

Pale yellow oil, 1.033 g (90%).

$^1\text{H}$  NMR (300 MHz,  $\text{CDCl}_3$ )  $\delta$  1.76 (d,  $J = 6.6$  Hz, 3H), 4.13 (d,  $J = 6.6$  Hz, 2H), 4.33 (s, 2H), 5.58-5.80 (m, 2H), 6.02-6.13 (m, 1H), 6.21-6.31 (m, 1H), 6.95-7.04 (m, 2H), 7.38-7.46 (m, 2H).

$^{13}\text{C}$  NMR (75 MHz,  $\text{CDCl}_3$ )  $\delta$  18.0, 57.5, 70.1, 84.9, 85.0, 115.5 (d,  $J_{\text{C-F}} = 22.0$  Hz), 118.8 (d,  $J_{\text{C-F}} = 3.7$  Hz), 125.7, 130.3, 130.7, 133.6 (d,  $J_{\text{C-F}} = 8.5$  Hz), 134.0, 162.5 (d,  $J_{\text{C-F}} = 249.2$  Hz).

$^{19}\text{F}$  NMR (376 MHz,  $\text{CDCl}_3$ )  $\delta$  -111.2 (m, 1F).

HRMS (EI), Calcd for  $\text{C}_{15}\text{H}_{15}\text{FO}$  [ $\text{M}^+$ ]: 230.1107, Found: 230.1112.

**1-(3-Hexa-2,4-dienyloxy-prop-1-ynyl)-4-trifluoromethyl-benzene (1e)**

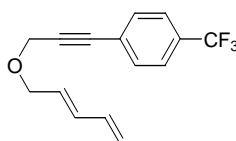

Colorless oil, 1.258 g (90%).

$^1\text{H}$  NMR (300 MHz,  $\text{CDCl}_3$ )  $\delta$  1.76 (d,  $J = 6.6$  Hz, 3H), 4.12 (d,  $J = 6.6$  Hz, 2H), 4.37 (s, 2H),

Supplementary Material (ESI) for Chemical Communications

This journal is (c) The Royal Society of Chemistry 2008

5.61-5.80 (m, 2H), 6.08 (dd,  $J = 14.1, 10.5$  Hz, 1H), 6.27 (dd,  $J = 15.3, 10.5$ , 1H), 7.54 (d,  $J = 9.0$  Hz, 2H), 7.57 (d,  $J = 9.0$  Hz, 2H).

$^{13}\text{C}$  NMR ( $\text{CDCl}_3$ , 75 MHz)  $\delta$  18.09, 57.43, 70.34, 84.78, 87.80, 123.85 (q,  $J_{\text{C-F}} = 271.7$  Hz), 125.20

(q,  $J_{\text{C-F}} = 3.8$  Hz), 125.52, 126.48, 130.12 (q,  $J_{\text{C-F}} = 33.2$  Hz), 130.63, 130.67, 131.96, 134.37.

$^{19}\text{F}$  NMR (376 MHz,  $\text{CDCl}_3$ )  $\delta$  -63.4 (s, 3F).

HRMS (ESI), Calcd for  $\text{C}_{16}\text{H}_{15}\text{F}_3\text{O}$  [ $\text{M}^+$ ]: 280.1075, Found: 280.1068.

### Typical experimental procedure (Table 2, Entry 1)

$\text{AgBF}_4$  (4.6 mg, 0.024 mmol) was added to a solution of  $[\text{RhCl}\{(R,R)\text{-DUPHOS}}\}]_2$  (10 mg, 0.01 mmol) and 1,5-diphenyl-1,5-cyclooctadiene (**3b**) (5.7 mg, 0.022 mmol) in dry deuterated dichloromethane (1.0 mL) under argon atmosphere. After the mixture was stirred for 30 min at room temperature, diene **1a** (32 mg, 0.2 mmol) was added and the reaction mixture was stirred at room temperature. The reaction was monitored by NMR. After the reaction was complete, the reaction mixture directly loaded onto a silica-gel column eluted with EtOAc/hexane (1/20) to give the corresponding cycloaddition product **2a** as a colorless oil (isolated yield 90%).

### 6-Methyl-7-phenyl-1,3,3a,6-tetrahydroisobenzofuran (**2a**)

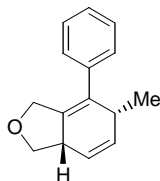

Colorless oil, 39 mg (90%).

$^1\text{H}$  NMR (300 MHz,  $\text{CDCl}_3$ )  $\delta$  0.94 (d,  $J = 7.5$  Hz, 3H), 3.10-3.30 (m, 2H), 3.39 (dd,  $J = 11.4, 7.5$ , 1H), 4.13 (d,  $J = 13.5$  Hz, 1H), 4.24 (d,  $J = 7.5$  Hz, 1H), 4.30 (d,  $J = 13.5$  Hz, 1H), 5.80 (s, 2H), 7.09-7.13 (m, 2H), 7.21-7.27 (m, 1H), 7.30-7.36 (m, 2H).

$^{13}\text{C}$  NMR (75 MHz,  $\text{CDCl}_3$ )  $\delta$  20.19, 34.57, 41.04, 68.25, 72.15, 121.76, 126.60, 128.02, 128.28, 132.10, 134.62, 134.94, 140.30.

HRMS (EI), Calcd for  $\text{C}_{15}\text{H}_{16}\text{O}$  [ $\text{M}^+$ ]: 212.1201, Found: 212.1202.

$[\alpha]_{\text{D}}^{24} = +85.3$  ( $c = 2.71$  in  $\text{CHCl}_3$ ) (88% *ee*).<sup>4</sup>

GC (column, CP-Cyclodextrin- $\beta$ -2,3,6-M-19, i.d. 0.25 mm x 25 m, CHROMPACK; carrier gas, nitrogen 75 kPa; column, 150 °C; injection temp, 180 °C),  $t_{\text{R}}$  of minor-isomer 48.8 min,  $t_{\text{R}}$  of major-isomer 50.7 min.

### 7-(4-Methoxy-phenyl)-6-methyl-1,3,3a,6-tetrahydroisobenzofuran (**2b**)

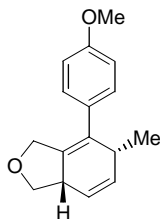

Colorless oil, 90% conv (NMR).

$^1\text{H}$  NMR (300 MHz,  $\text{CDCl}_3$ )  $\delta$  0.95 (d,  $J = 7.5$  Hz, 3H), 3.08-3.28 (m, 2H), 3.38 (dd,  $J = 11.4, 7.5$ , 1H), 3.81 (s, 3H), 4.14 (d,  $J = 14.4$  Hz, 1H), 4.23 (d,  $J = 7.5$  Hz, 1H), 4.28 (d,  $J = 14.4$  Hz, 1H), 5.79 (s, 2H), 6.87 (d,  $J = 8.7$  Hz, 1H), 7.03 (d,  $J = 8.7$  Hz, 1H).

$^{13}\text{C}$  NMR (75 MHz,  $\text{CDCl}_3$ )  $\delta$  20.24, 34.78, 41.10, 55.19, 68.36, 72.20, 113.74, 121.76, 129.14, 131.73, 132.62, 134.72, 135.04, 158.27.

HRMS (EI), Calcd for  $\text{C}_{16}\text{H}_{18}\text{O}_2$  [ $\text{M}^+$ ]: 242.1307, Found: 242.1305.

$[\alpha]_{\text{D}}^{23} = +59.8$  ( $c = 1.01$  in  $\text{CHCl}_3$ ) (81% *ee*).<sup>4</sup>

GC (column, CP-Cyclodextrin- $\beta$ -2,3,6-M-19, i.d. 0.25 mm x 25 m, CHROMPACK; carrier gas, nitrogen 75 kPa; column, 180 °C; injection temp, 180 °C),  $t_{\text{R}}$  of minor-isomer 49.4 min,  $t_{\text{R}}$  of major-isomer 50.9 min.

#### 7-(4-Chloro-phenyl)-6-methyl-1,3,3a,6-tetrahydroisobenzofuran (2c)

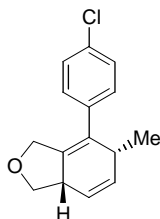

Colorless oil, 95% conv. (NMR).

$^1\text{H}$  NMR (300 MHz,  $\text{CDCl}_3$ )  $\delta$  0.93 (d,  $J = 6.9$  Hz, 3H), 3.07-3.28 (m, 2H), 3.38 (dd,  $J = 11.4, 7.2$ , 1H), 4.12 (d,  $J = 13.5$  Hz, 1H), 4.24 (d,  $J = 13.5$  Hz, 1H), 4.26 (d,  $J = 7.2$  Hz, 1H), 5.79 (s, 2H), 7.05 (d,  $J = 8.4$  Hz, 1H), 7.31 (d,  $J = 8.4$  Hz, 1H).

$^{13}\text{C}$  NMR (75 MHz,  $\text{CDCl}_3$ )  $\delta$  20.12, 34.47, 41.10, 68.17, 72.13, 121.79, 128.59, 129.46, 131.00, 132.52, 134.43, 135.80, 138.68.

HRMS (EI), Calcd for  $\text{C}_{15}\text{H}_{15}\text{ClO}$  [ $\text{M}^+$ ]: 246.0811, Found: 246.0805.

$[\alpha]_{\text{D}}^{24} = +83.3$  ( $c = 2.19$  in  $\text{CHCl}_3$ ) (86% *ee*).<sup>4</sup>

GC (column, CP-Cyclodextrin- $\beta$ -2,3,6-M-19, i.d. 0.25 mm x 25 m, CHROMPACK; carrier gas, nitrogen 75 kPa; column, 180 °C; injection temp, 180 °C),  $t_{\text{R}}$  of minor-isomer 39.9 min,  $t_{\text{R}}$  of major-isomer 41.0 min.

#### 7-(4-Fluoro-phenyl)-6-methyl-1,3,3a,6-tetrahydroisobenzofuran (2d)

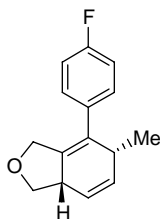

Colorless oil, 42 mg (92%).

$^1\text{H}$  NMR (300 MHz,  $\text{CDCl}_3$ )  $\delta$  0.93 (d,  $J = 7.2$  Hz, 3H), 3.08-3.28 (m, 2H), 3.38 (dd,  $J = 10.8, 6.9$ , 1H), 4.12 (d,  $J = 13.2$  Hz, 1H), 4.24 (d,  $J = 13.2$  Hz, 1H), 4.26 (d,  $J = 6.9$  Hz, 1H), 5.79 (s, 2H), 6.99-7.11 (m, 4H).

$^{13}\text{C}$  NMR (75 MHz,  $\text{CDCl}_3$ )  $\delta$  20.12, 34.65, 41.10, 68.22, 72.16, 115.25 (d,  $J_{\text{C-F}} = 20.8$  Hz), 121.81, 129.65 (d,  $J_{\text{C-F}} = 8.53$  Hz), 131.19, 134.51, 135.69, 136.10 (d,  $J_{\text{C-F}} = 3.6$  Hz), 161.65 (d,  $J_{\text{C-F}} = 245.4$  Hz).

$^{19}\text{F}$  NMR (376 MHz,  $\text{CDCl}_3$ )  $\delta$  -116.4 (m, 1F).

HRMS (EI), Calcd for  $\text{C}_{15}\text{H}_{15}\text{FO}$  [ $\text{M}^+$ ]: 230.1107, Found: 230.1108.

$[\alpha]_{\text{D}}^{22} = +95.7$  ( $c = 1.90$  in  $\text{CHCl}_3$ ) (93% *ee*).<sup>4</sup>

GC (column, CP-Cyclodextrin- $\beta$ -2,3,6-M-19, i.d. 0.25 mm x 25 m, CHROMPACK; carrier gas, nitrogen 75 kPa; column, 180 °C; injection temp, 180 °C),  $t_{\text{R}}$  of minor-isomer 18.6 min,  $t_{\text{R}}$  of major-isomer 19.0 min.

### 6-Methyl-7-(4-trifluoromethyl-phenyl)-1,3,3a,6-tetrahydro-isobenzofuran (2e)

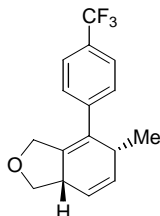

Colorless oil, 48 mg (86%).

$^1\text{H}$  NMR (300 MHz,  $\text{CDCl}_3$ )  $\delta$  0.95 (d,  $J = 7.2$  Hz, 3H), 3.16-3.33 (m, 2H), 3.41 (dd,  $J = 11.1, 7.2$ , 1H), 4.14 (ddd,  $J = 13.5, 3.0, 1.2$  Hz, 1H), 4.27 (d,  $J = 13.5$  Hz, 1H), 4.30 (d,  $J = 7.2$  Hz, 1H), 5.82 (s, 2H), 7.26 (d,  $J = 8.1$  Hz, 1H), 7.62 (d,  $J = 8.1$  Hz, 1H).

$^{13}\text{C}$  NMR (75 MHz,  $\text{CDCl}_3$ )  $\delta$  20.10, 34.32, 41.07, 68.06, 72.06, 121.78, 124.17 (q,  $J_{\text{C-F}} = 272.4$  Hz), 125.37 (q,  $J_{\text{C-F}} = 3.8$  Hz), 128.41, 129.13 (q,  $J_{\text{C-F}} = 32.5$  Hz), 130.93, 134.28, 136.14, 144.07.

$^{19}\text{F}$  NMR (376 MHz,  $\text{CDCl}_3$ )  $\delta$  -63.0 (s, 3F).

HRMS (ESI), Calcd for  $\text{C}_{16}\text{H}_{15}\text{F}_3\text{O}$  [ $\text{M}^+$ ]: 280.1075, Found: 280.1074.

$[\alpha]_{\text{D}}^{25} = +97.5$  ( $c = 2.80$  in  $\text{CHCl}_3$ ) (98% *ee*).<sup>4</sup>

GC (column, CP-Cyclodextrin- $\beta$ -2,3,6-M-19, i.d. 0.25 mm x 25 m, CHROMPACK; carrier gas, nitrogen 75 kPa; column, 170 °C; injection temp, 180 °C),  $t_{\text{R}}$  of minor-isomer 25.1 min,  $t_{\text{R}}$  of major-isomer 26.0 min.

**Cartesian matrix (Gaussian output) for the most stable diastereomer (S/S,S)-Me-COD  
(3a)-Rh-DUPHOS complex (Rh) calculated at B3LYP/6-31G(d)-SDD<sup>5,6</sup>**

Rh,0,-0.0763730583,0.0920721976,0.1441721874  
C,0,-0.3218894148,-0.2636824942,2.3605026246  
C,0,1.0593543177,-0.3177141101,2.1579919992  
C,0,-0.3885115535,2.2924028107,0.8856253513  
C,0,0.9196570943,2.0978728205,0.4400605127  
P,0,0.0629436944,0.2901582989,-2.2263525981  
P,0,-1.0361970856,-2.0192786551,-0.4015831043  
C,0,-0.9751980183,-1.0153440921,-3.0264041507  
C,0,-2.4570870291,-3.130144327,-4.1433476213  
C,0,-1.4385985119,-2.0611904355,-2.206211493  
C,0,-1.2766521496,-1.0407162303,-4.3995859378  
C,0,-2.0143984854,-2.0846096625,-4.9540600085  
C,0,-2.1680526522,-3.1160609671,-2.7808661691  
H,0,-0.9439784944,-0.2415000908,-5.0496943564  
H,0,-2.2412975074,-2.0803254313,-6.016073131  
H,0,-2.5177927205,-3.939483258,-2.1667831817  
H,0,-3.0272860783,-3.9510290156,-4.5680392187  
C,0,-2.6616841266,-2.5791354975,0.4112772534  
C,0,-0.1452075695,-3.6476504969,-0.0294772867  
C,0,-2.2593108361,-3.7865999742,1.2825432375  
H,0,-3.1444954091,-4.3766541106,1.5483525034  
H,0,-1.8151282806,-3.4393958683,2.2258847584  
C,0,-1.232624292,-4.6107879765,0.4945755251  
H,0,-0.7775110492,-5.3939327531,1.1122002387  
C,0,1.7766538867,-0.0440528771,-2.9542441537  
C,0,-0.1589492986,1.869026277,-3.2282075733  
C,0,0.8591667512,1.8114726154,-4.4124606064  
H,0,0.3286352664,1.9113289814,-5.3660777581  
H,0,1.5288290191,2.6757257336,-4.3469148666  
C,0,1.6819334325,0.4980146508,-4.3963959192  
H,0,1.2082629639,-0.2526267523,-5.0353292539  
H,0,2.686288551,0.6577734846,-4.8059995499  
C,0,-0.7246725406,2.2792449976,2.3845002292  
H,0,-1.5608931882,2.960918705,2.5594544692

Supplementary Material (ESI) for Chemical Communications

This journal is (c) The Royal Society of Chemistry 2008

H,0,0.123088743,2.7064214461,2.9284293082  
C,0,-1.0924048855,0.8972995992,2.9520455831  
H,0,-0.9686308968,0.9059706254,4.0470058678  
H,0,-2.1575699642,0.7184314395,2.7749414418  
C,0,2.1344425033,1.907211088,1.324549932  
H,0,2.4392500186,2.8764599484,1.7506827887  
H,0,2.9645187951,1.5926352518,0.684822366  
C,0,1.9704693805,0.8813715228,2.464802491  
H,0,1.5883739896,1.3684704151,3.3676695322  
H,0,2.9605059292,0.5042829965,2.7333993339  
H,0,-1.7263011899,-5.1193092559,-0.3444639814  
H,0,0.1653556822,2.6482805657,-2.5305410094  
H,0,1.9312498658,-1.1291723663,-2.9558712093  
H,0,-3.2549316227,-2.9581827559,-0.4289531542  
H,0,0.5064082381,-3.3927160005,0.8096967337  
C,0,-1.5972233268,2.2214120521,-3.6318689763  
H,0,-1.6106944887,3.213013473,-4.0973007247  
H,0,-2.2617598485,2.2564151038,-2.7650170822  
H,0,-2.014457809,1.5127069713,-4.3515576683  
C,0,2.9115472597,0.6163891662,-2.1608295777  
H,0,2.8164812402,1.7080903527,-2.132639839  
H,0,3.8726406641,0.3863845362,-2.6354686877  
H,0,2.9440592036,0.2525421612,-1.1312193945  
C,0,-3.503992888,-1.5186493815,1.1202190783  
H,0,-3.7308241568,-0.6747904992,0.4601999619  
H,0,-3.0086682945,-1.1305465348,2.0134366462  
H,0,-4.4574078847,-1.9579825988,1.4372238884  
C,0,0.7295483334,-4.2123180018,-1.1518475716  
H,0,1.504282874,-3.500683435,-1.4577105672  
H,0,0.1444407589,-4.4805664432,-2.0369889028  
H,0,1.2380664965,-5.1164912492,-0.7980316585  
H,0,-0.8236151987,-1.2213990512,2.4782041946  
H,0,1.1597262029,2.4797032953,-0.5494696497  
C,0,-1.3997228636,3.0159094872,0.052727401  
C,0,-1.040871083,4.181137861,-0.6464798952  
C,0,-2.7590468252,2.6512205299,0.0850872482  
C,0,-2.0071094874,4.953378551,-1.2959092916  
H,0,-0.0061311723,4.5129932379,-0.6409616385

Supplementary Material (ESI) for Chemical Communications

This journal is (c) The Royal Society of Chemistry 2008

C,0,-3.7215523522,3.4150889846,-0.5724995439  
H,0,-3.0600927245,1.762843197,0.6332018775  
C,0,-3.3491090972,4.5729821374,-1.2626747821  
H,0,-1.7104919397,5.8623825217,-1.811698921  
H,0,-4.7650954228,3.1148321569,-0.536852088  
H,0,-4.1014749881,5.1780403538,-1.7600110266  
C,0,1.7681269781,-1.6357715328,2.1580963699  
C,0,1.4017914453,-2.6393452551,3.0727695208  
C,0,2.8853514486,-1.8656135527,1.3343327505  
C,0,2.1115921342,-3.8406230319,3.1429690105  
H,0,0.5764960659,-2.4667117598,3.7575683122  
C,0,3.5856819931,-3.0687973521,1.3939916598  
H,0,3.2015327112,-1.0957280186,0.6366263343  
C,0,3.1999485676,-4.0632983484,2.2983544623  
H,0,1.8209908879,-4.5946904299,3.8690609828  
H,0,4.4403823159,-3.2280650655,0.7424675131  
H,0,3.7550671368,-4.9950377703,2.3551051147

Total energy = -1886.634681 au

Zero-point energy = 418.2058 kcal/mol

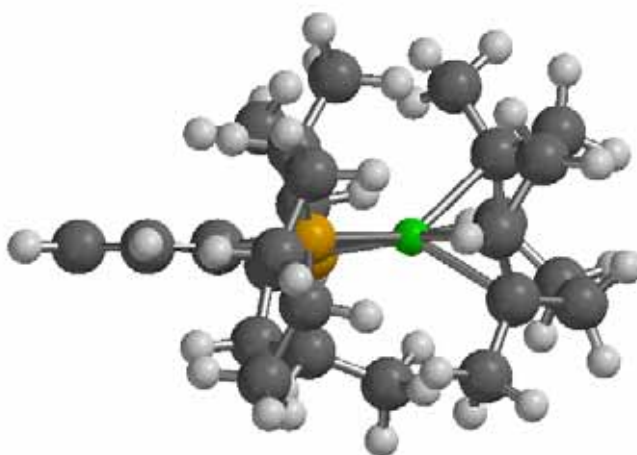

side view

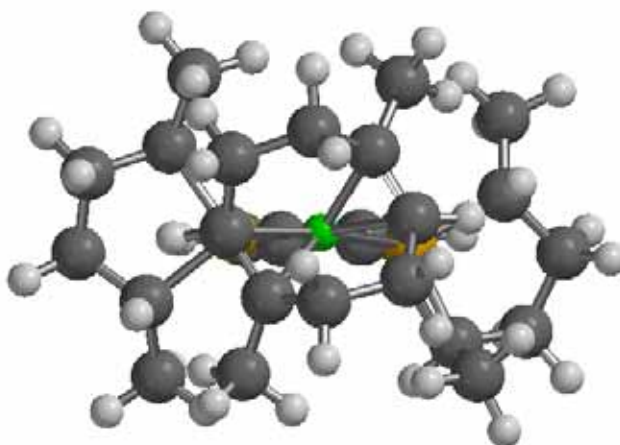

front view

**Cartesian matrix (Gaussian output) and side and front view for the unstable diastereomer (R/S,S)-Me-COD (3a)-Rh-DUPHOS complex (Rh') calculated at B3LYP/6-31G(d)-SDD**

Rh,0,-0.2057326457,-0.062744772,-0.0247881486  
C,0,0.1331693154,0.1188483002,2.2373072984  
C,0,1.3877794391,-0.0278754195,1.6565447713  
C,0,-0.3195579422,2.1492568476,0.1846013086  
C,0,0.8298619144,1.815382716,-0.5629005979  
P,0,0.4846028393,-2.2011372874,-0.9204337887  
P,0,-1.9688621472,-0.3282234652,-1.5372624739  
C,0,-0.4690655398,-2.4709749037,-2.4937035993  
C,0,-1.9391755295,-2.8290444584,-4.865911691  
C,0,-1.5387191266,-1.6008317374,-2.8026974086  
C,0,-0.1885756209,-3.5356843002,-3.3646620559  
C,0,-0.9103351334,-3.7133090593,-4.5441743518  
C,0,-2.2568164307,-1.7884588352,-3.9937871926  
H,0,0.6058441016,-4.2362346499,-3.1321756117  
H,0,-0.6651779893,-4.5356939504,-5.2096772076  
H,0,-3.0781409585,-1.1304966519,-4.2553076456  
H,0,-2.5028330721,-2.9537768238,-5.7856772267  
C,0,-3.1741189362,0.8937904496,-2.3336353587  
C,0,-3.3192681788,-1.0817712,-0.4075146592  
C,0,-4.2315866305,1.097834985,-1.2312755383  
H,0,-5.0969675077,1.6380692844,-1.6323189516  
H,0,-3.8218184079,1.7097194449,-0.4152596556

Supplementary Material (ESI) for Chemical Communications

This journal is (c) The Royal Society of Chemistry 2008

C,0,-4.6132198817,-0.2965355918,-0.7239872471  
H,0,-5.2597524025,-0.2537359125,0.159635353  
C,0,0.68508802,-3.9901182105,-0.27571402  
C,0,2.332368854,-1.9976980914,-1.3629712834  
C,0,3.0218579372,-3.1623920598,-0.613752971  
H,0,4.0155163057,-3.356611657,-1.0340235807  
H,0,3.1731835526,-2.89043447,0.438980221  
C,0,2.1181193089,-4.4005941417,-0.6960072237  
H,0,2.1201514227,-4.7880038942,-1.7217005261  
H,0,2.48787004,-5.2108003851,-0.0567451577  
C,0,-0.283831843,2.6104518823,1.6378479589  
H,0,-1.0860209069,3.3392727384,1.7955744149  
H,0,0.6466233264,3.1519157738,1.8372641276  
C,0,-0.4748251696,1.4576815455,2.6387093459  
H,0,-0.0809856424,1.7335436213,3.6299375805  
H,0,-1.5494611518,1.2944470237,2.7839896709  
C,0,2.2317429705,1.7731665357,0.0372290704  
H,0,2.623662685,2.8023179684,0.0687465884  
H,0,2.8744369345,1.240113135,-0.6730452152  
C,0,2.3650246147,1.114334822,1.4244591807  
H,0,2.2522170135,1.8591080087,2.2181979191  
H,0,3.3843529502,0.727225623,1.5276216978  
H,0,-5.1758709574,-0.823493459,-1.50626019  
H,0,2.6271124153,-1.0442613834,-0.9179272122  
H,0,-0.0611803597,-4.591097505,-0.8053774302  
H,0,-3.6669356231,0.3111273777,-3.1217665182  
H,0,-2.9906372521,-0.8136450058,0.6039615868  
C,0,2.6742877824,-1.9453486245,-2.8581085073  
H,0,3.7385098654,-1.7080859895,-2.9730095817  
H,0,2.1014415829,-1.1751165291,-3.3850659251  
H,0,2.4939196979,-2.8963484357,-3.3665572494  
C,0,0.4502999963,-4.1632231798,1.2292426925  
H,0,1.1873573589,-3.6166309225,1.8277678734  
H,0,0.5395066007,-5.2235514731,1.4927172854  
H,0,-0.5485617207,-3.8309379152,1.5275239175  
C,0,-2.6563671608,2.1829482379,-2.9726030565  
H,0,-1.9209973506,1.988257919,-3.7598164992  
H,0,-2.2095478404,2.8609914704,-2.2400442113

Supplementary Material (ESI) for Chemical Communications

This journal is (c) The Royal Society of Chemistry 2008

H,0,-3.4954671144,2.7149128592,-3.4361087077

C,0,-3.4879228266,-2.6013323005,-0.4803774451

H,0,-2.5731609736,-3.1320995768,-0.1964356835

H,0,-3.7706607935,-2.929257368,-1.4860489921

H,0,-4.280026417,-2.9158254951,0.2095952916

H,0,1.8253813488,-1.0229511482,1.692844708

C,0,-0.5417676641,-1.0519815101,2.9178896862

H,0,-0.0434094198,-1.9988754629,2.7171406166

H,0,-1.5986591776,-1.1387048087,2.6388986438

H,0,-0.5197152506,-0.8843861499,4.0048196922

C,0,0.8743988611,2.0203935586,-2.0632585116

H,0,1.4033322414,1.2050017084,-2.5693461484

H,0,1.4331996264,2.9438166486,-2.2790866839

H,0,-0.114468844,2.1227182624,-2.505040275

H,0,-1.1696009656,2.5153666576,-0.3848583408

Total energy = -1886. 626167 au

Zero-point energy = 417.92299 kcal/mol

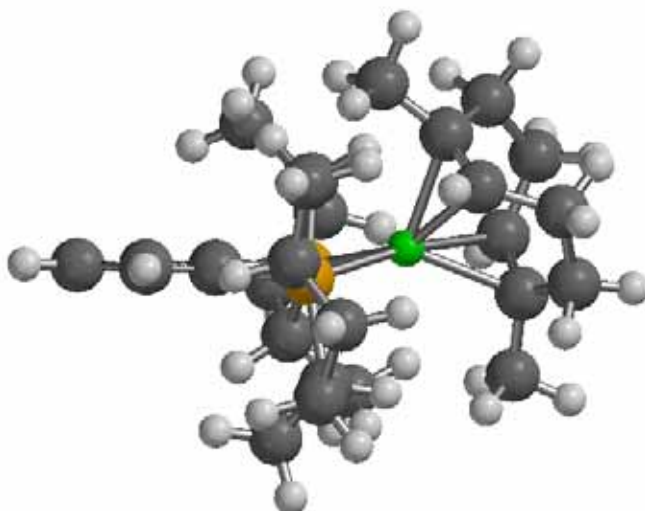

side view

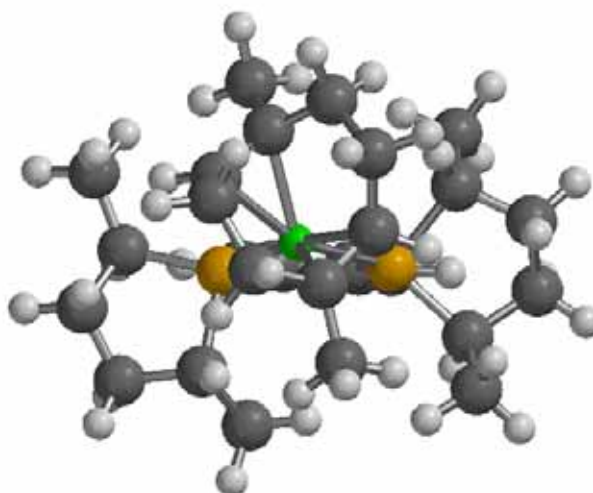

front view

<sup>1</sup> Shriver, D. F.; Drezdon, M. A., *The Manipulation of Air-Sensitive Compounds*, 2<sup>nd</sup> ed. Ed.; John Wiley & Sons: New York: **1986**.

<sup>2</sup> Kina, A.; Ueyama, K.; Hayashi, T. *Org. Lett.* **2005**, 7, 5889-5892.

<sup>3</sup> Hayashi, T.; Takahashi, M.; Takaya, Y.; Ogasawara, M. *J. Am. Chem. Soc.* **2002**, 124, 5052.

<sup>4</sup> Aikawa, K.; Akutagawa, S.; Mikami, K. *J. Am. Chem. Soc.* **2006**, 128, 12648-12649.

<sup>5</sup> *Gaussian 03, Revision D.02*, M. J. Frisch, G. W. Trucks, H. B. Schlegel, G. E. Scuseria, M. A. Robb, J. R. Cheeseman, J. A. Montgomery, Jr., T. Vreven, K. N. Kudin, J. C. Burant, J. M. Millam, S. S. Iyengar, J. Tomasi, V. Barone, B. Mennucci, M. Cossi, G. Scalmani, N. Rega, G. A. Petersson, H. Nakatsuji, M. Hada, M. Ehara, K. Toyota, R. Fukuda, J. Hasegawa, M. Ishida, T. Nakajima, Y. Honda, O. Kitao, H. Nakai, M. Klene, X. Li, J. E. Knox, H. P. Hratchian, J. B. Cross, V. Bakken, C. Adamo, J. Jaramillo, R. Gomperts, R. E. Stratmann, O. Yazyev, A. J. Austin, R. Cammi, C. Pomelli, J. W. Ochterski, P. Y. Ayala, K. Morokuma, G. A. Voth, P. Salvador, J. J. Dannenberg, V. G. Zakrzewski, S. Dapprich, A. D. Daniels, M. C. Strain, O. Farkas, D. K. Malick, A. D. Rabuck, K. Raghavachari, J. B. Foresman, J. V. Ortiz, Q. Cui, A. G. Baboul, S. Clifford, J. Cioslowski, B. B. Stefanov, G. Liu, A. Liashenko, P. Piskorz, I. Komaromi, R. L. Martin, D. J. Fox, T. Keith, M. A. Al-Laham, C. Y. Peng, A. Nanayakkara, M. Challacombe, P. M. W. Gill, B. Johnson, W. Chen, M. W. Wong, C. Gonzalez, and J. A. Pople, *Gaussian, Inc., Wallingford CT, 2004*.

<sup>6</sup> For recent excellent review of *ab initio* molecular orbital theory, see F. Jensen, *Introduction to Computational Chemistry 2nd Ed.*, Wiley, England, 2007.
